# Supplementary material for: R2R3-MYB Transcription Factors Regulate Anthocyanin Biosynthesis in Grapevine Vegetative Tissues
Source: PubMed Central journal article supplement (PMC7221203; doi:10.3389/fpls.2020.00527), 2020-05-07

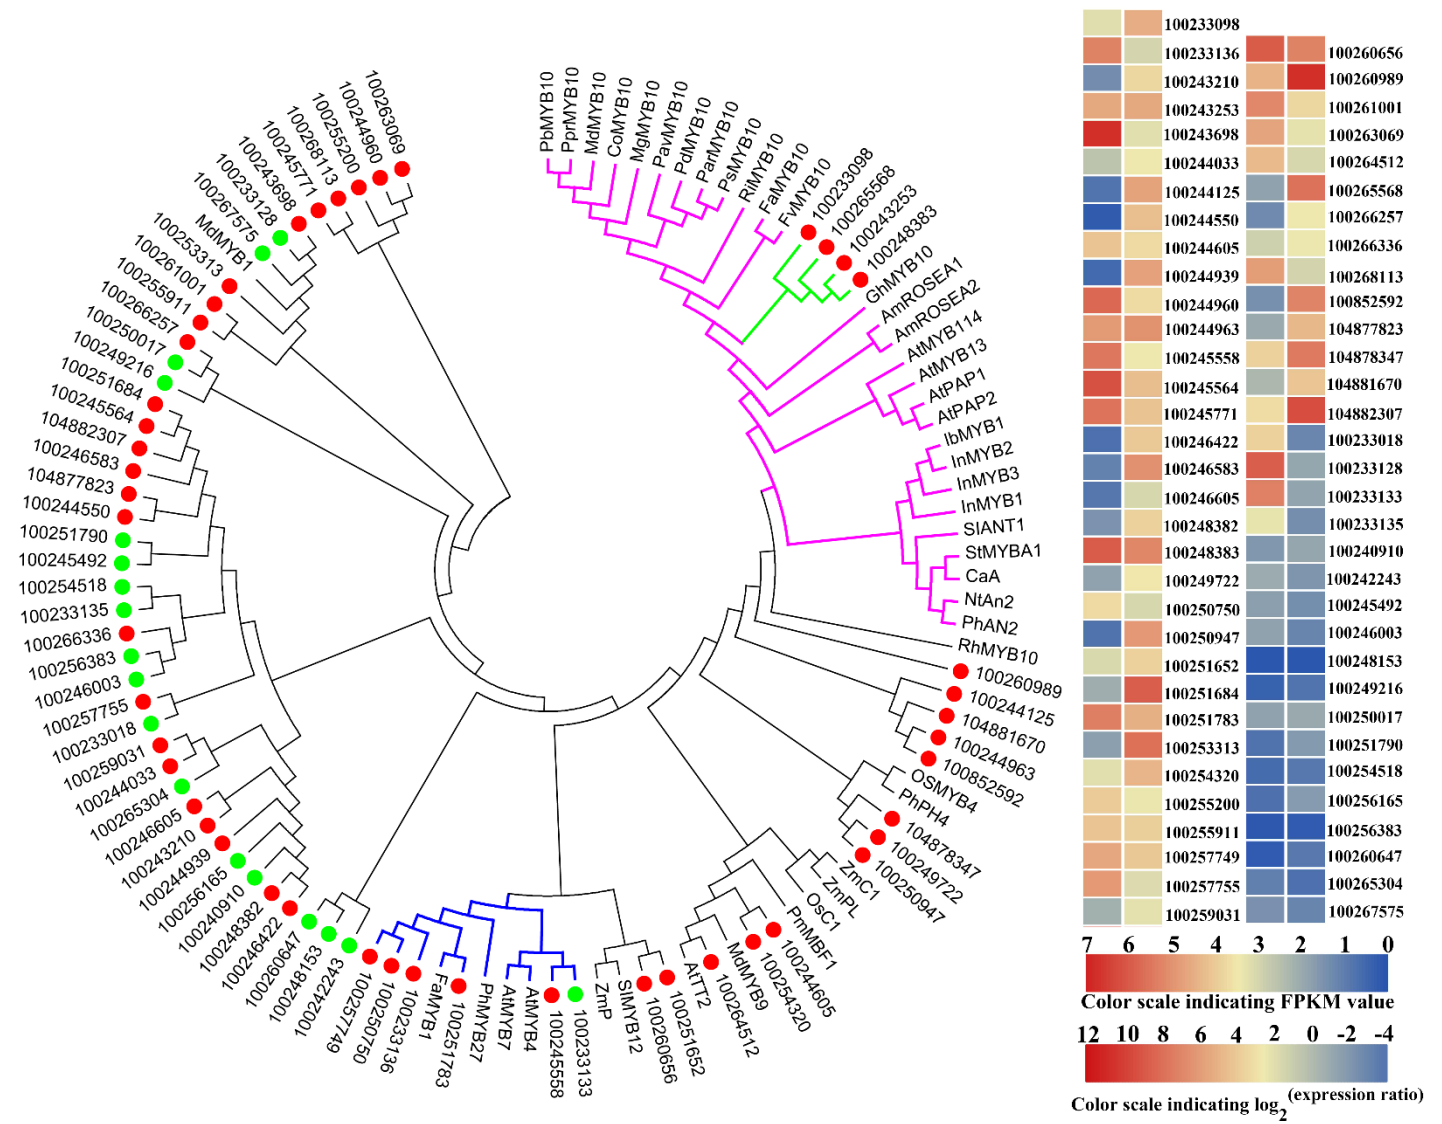

**Supplementary Figure S1.** Phylogenetic relationships among R2R3-MYB family members detected in Yan73 and its male parent leaves (based on RNA-seq data) and the R2R3-MYBs from other species. The gene IDs are listed in Supplementary Tables S2 and Tables S5. The up- and down-regulated transcription factors in Yan73 red leaf are indicated with red and green dots, respectively, and the corresponding transcript patterns are presented on the following two grids: the left presents the FPKM values of Yan73 red leaf, whereas the right presents the  $\log_2(\text{Yan73 red leaf/ its male parent leaf})$  values. The grid in the above with seven colors indicates the absolute expression levels in Yan73 leaf, with the FPKM values 0–2<sup>1</sup>, 2<sup>1</sup>–2<sup>2</sup>, 2<sup>2</sup>–2<sup>3</sup>, 2<sup>3</sup>–2<sup>4</sup>, 2<sup>4</sup>–2<sup>5</sup>, 2<sup>5</sup>–2<sup>6</sup> and 2<sup>6</sup>–2<sup>7</sup> represented by 0–1, 1–2, 2–3, 3–4, 4–5, 5–6 and 6–7 respectively. Each functional clade is highlighted.

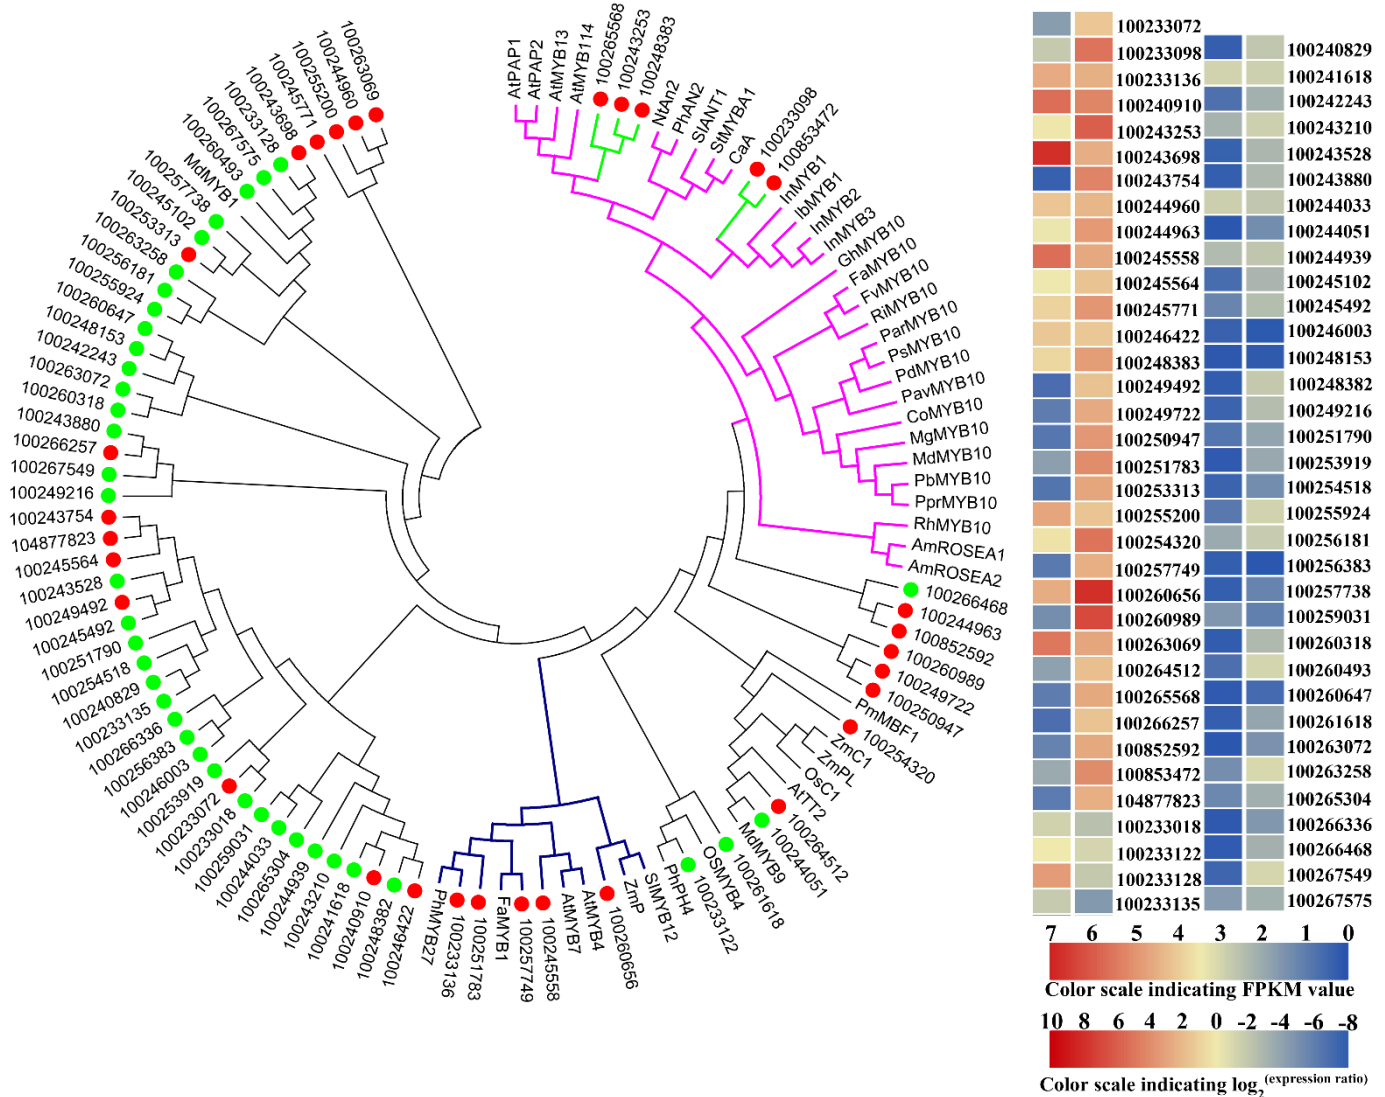

Supplement: Data_Sheet_1.pdf [file Data_Sheet_1.pdf]
